# Supplementary material for: The development of corannulene-based blue emitters
Source: Royal Society of Chemistry journal article supplement (doi:10.1039/b705621d), 2007-01-01
Supplement: b705621d.pdf [file b705621d.pdf]

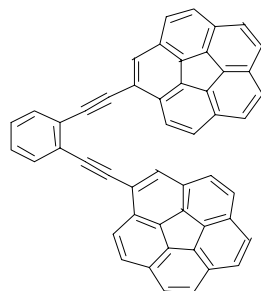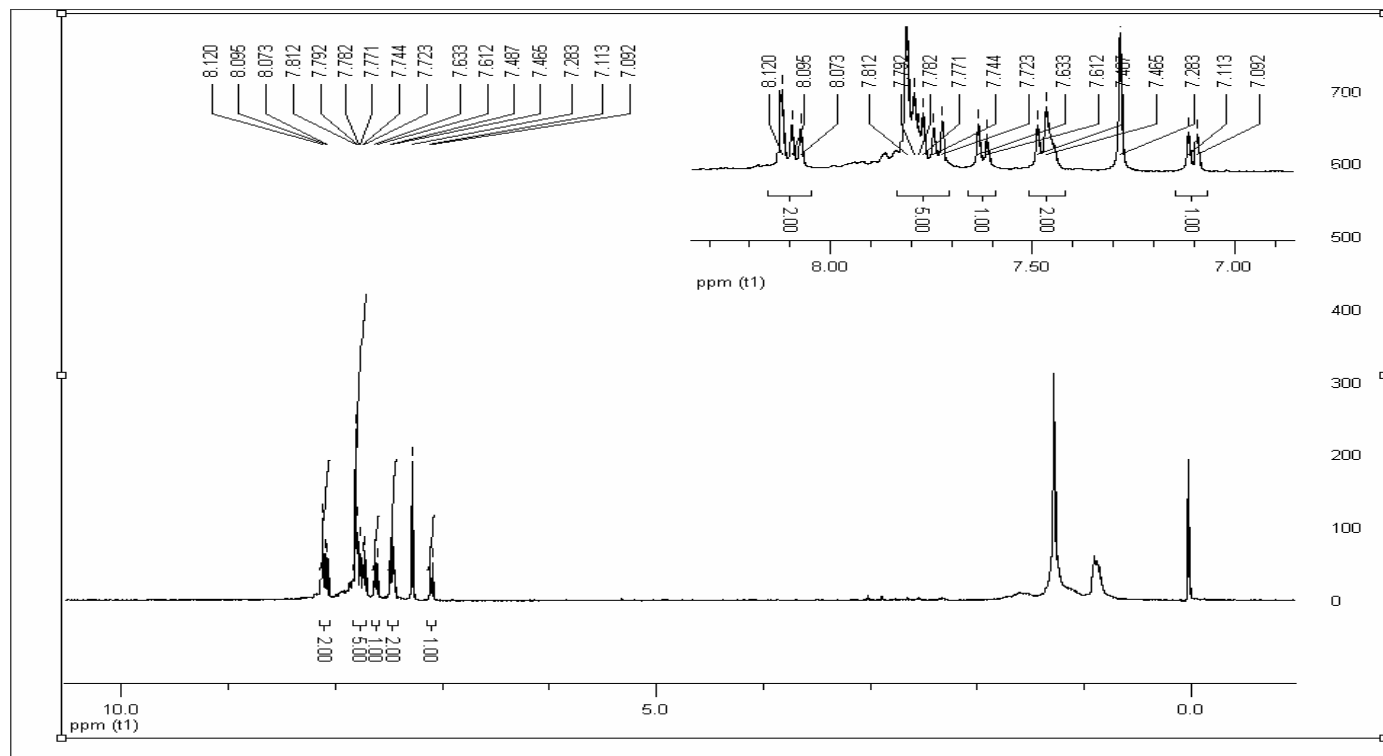

$^1\text{H}$  NMR spectrum of 1,2-diethynylcorannulenebenzene (5)

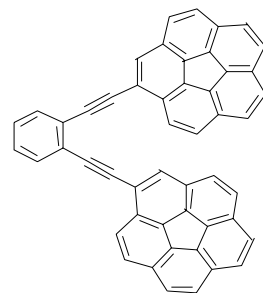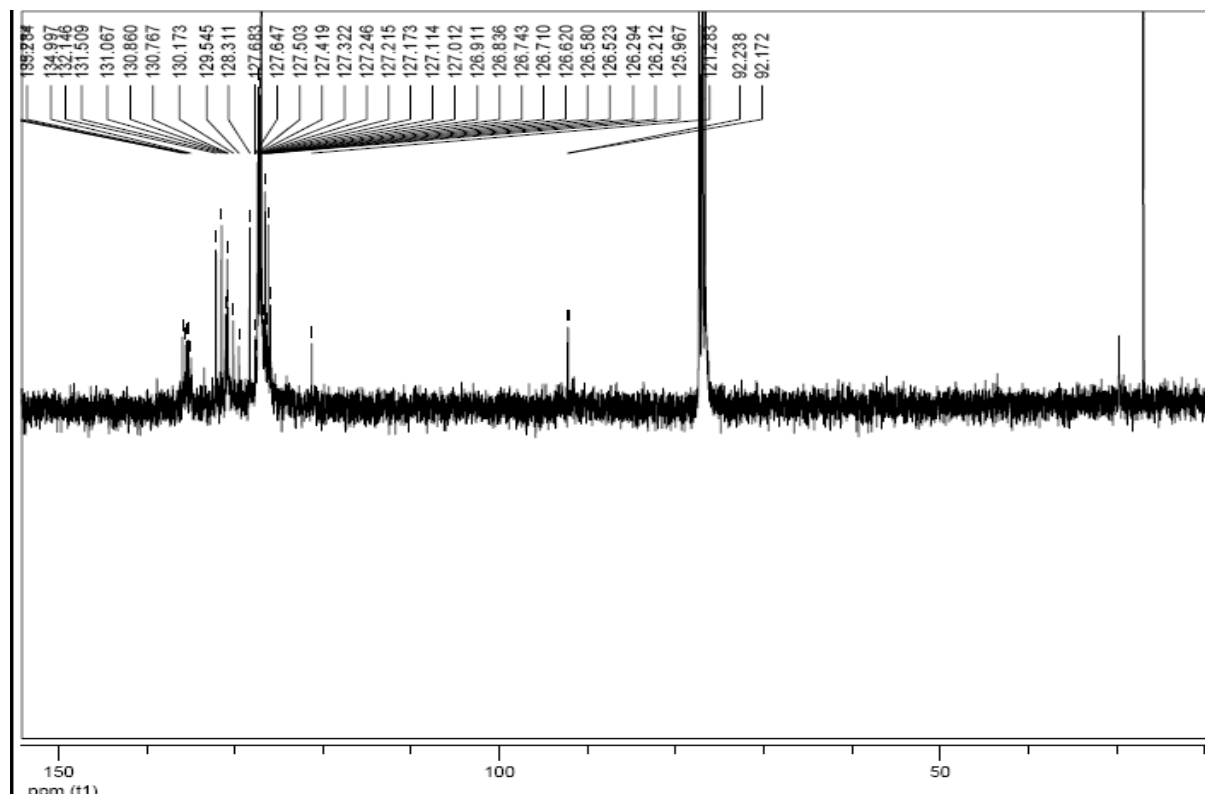

$^{13}\text{C}$  NMR spectrum of 1, 2 diethynylcorannulenebenzene (**5**)

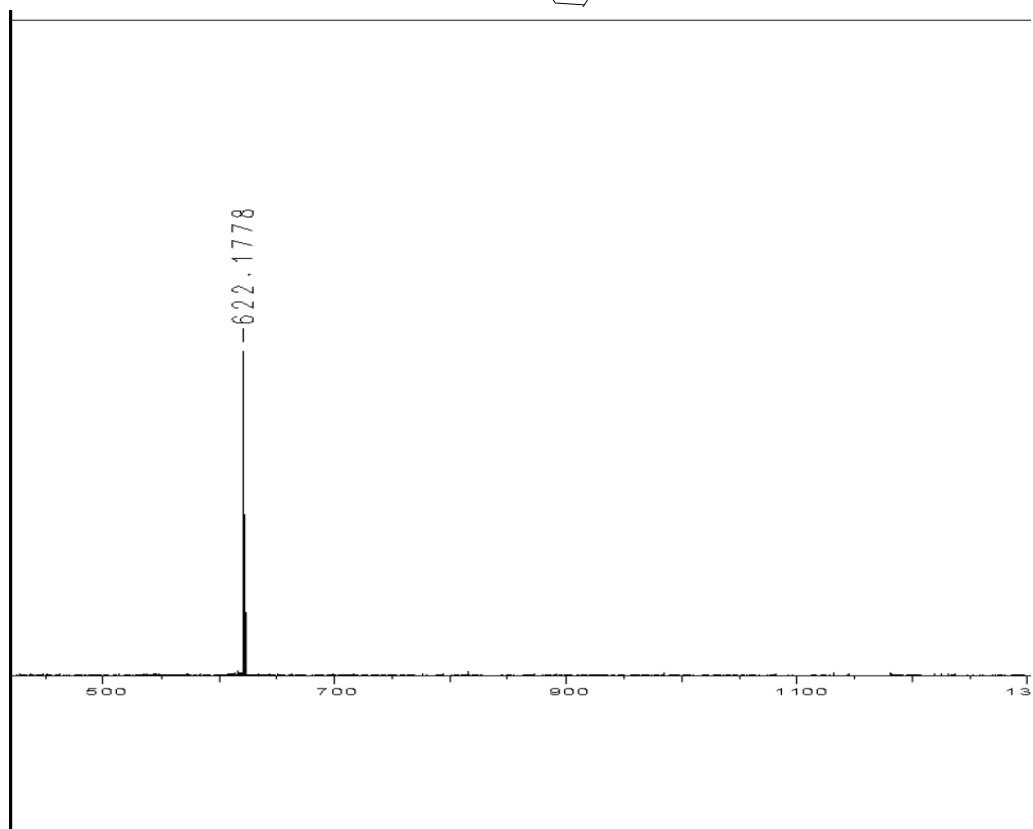

MALDI-TOF of 1,2 diethynylcorannulenebenzene (**5**)

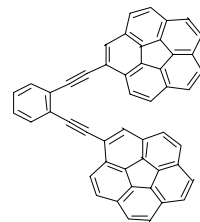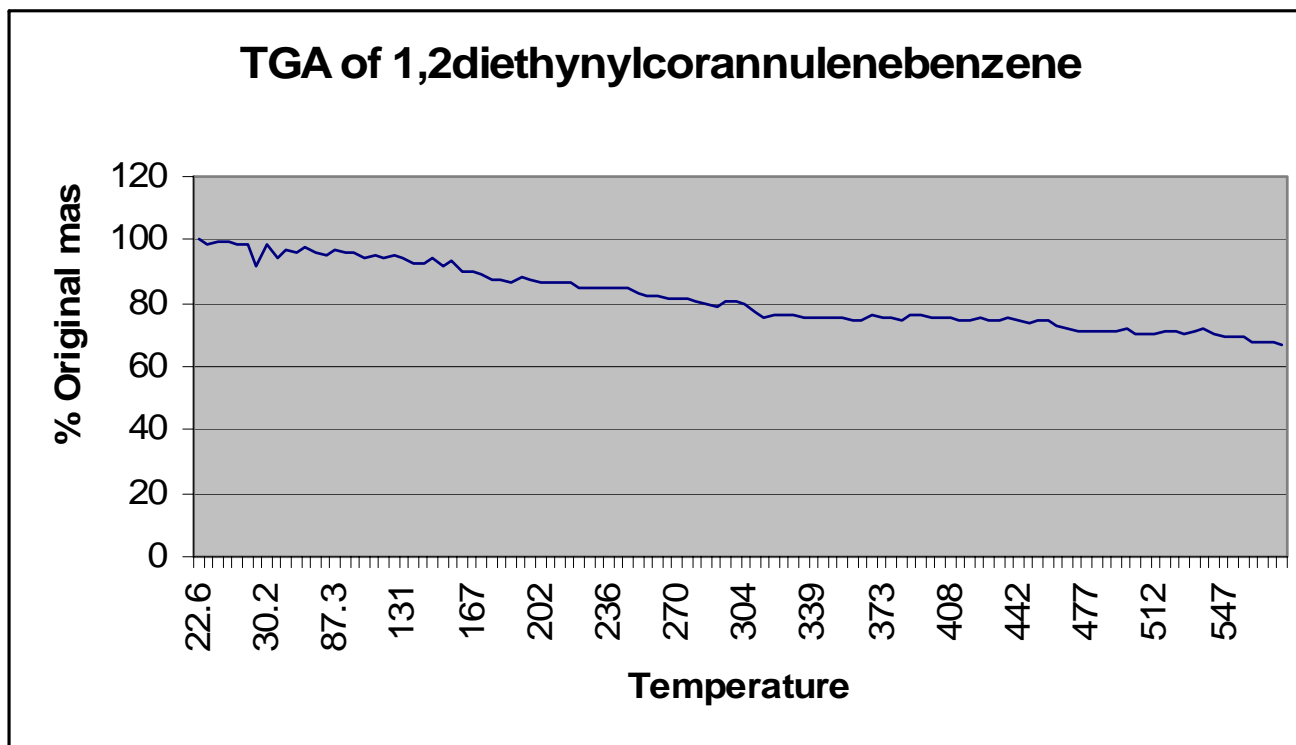

TGA of 1,2 diethynylcorannulenebenzene (5)

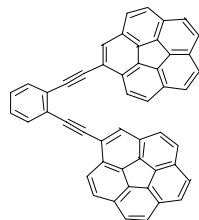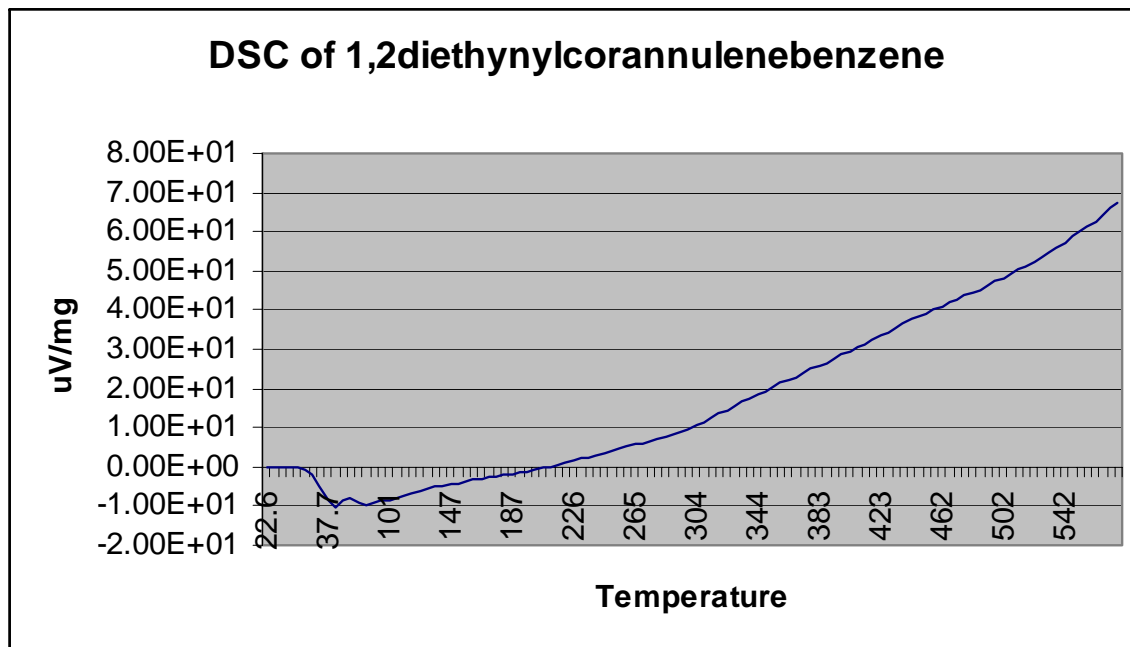

DSC of 1,2 diethynylcorannulenebenzene (6)

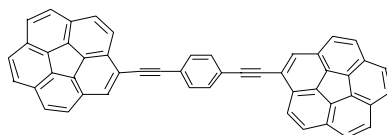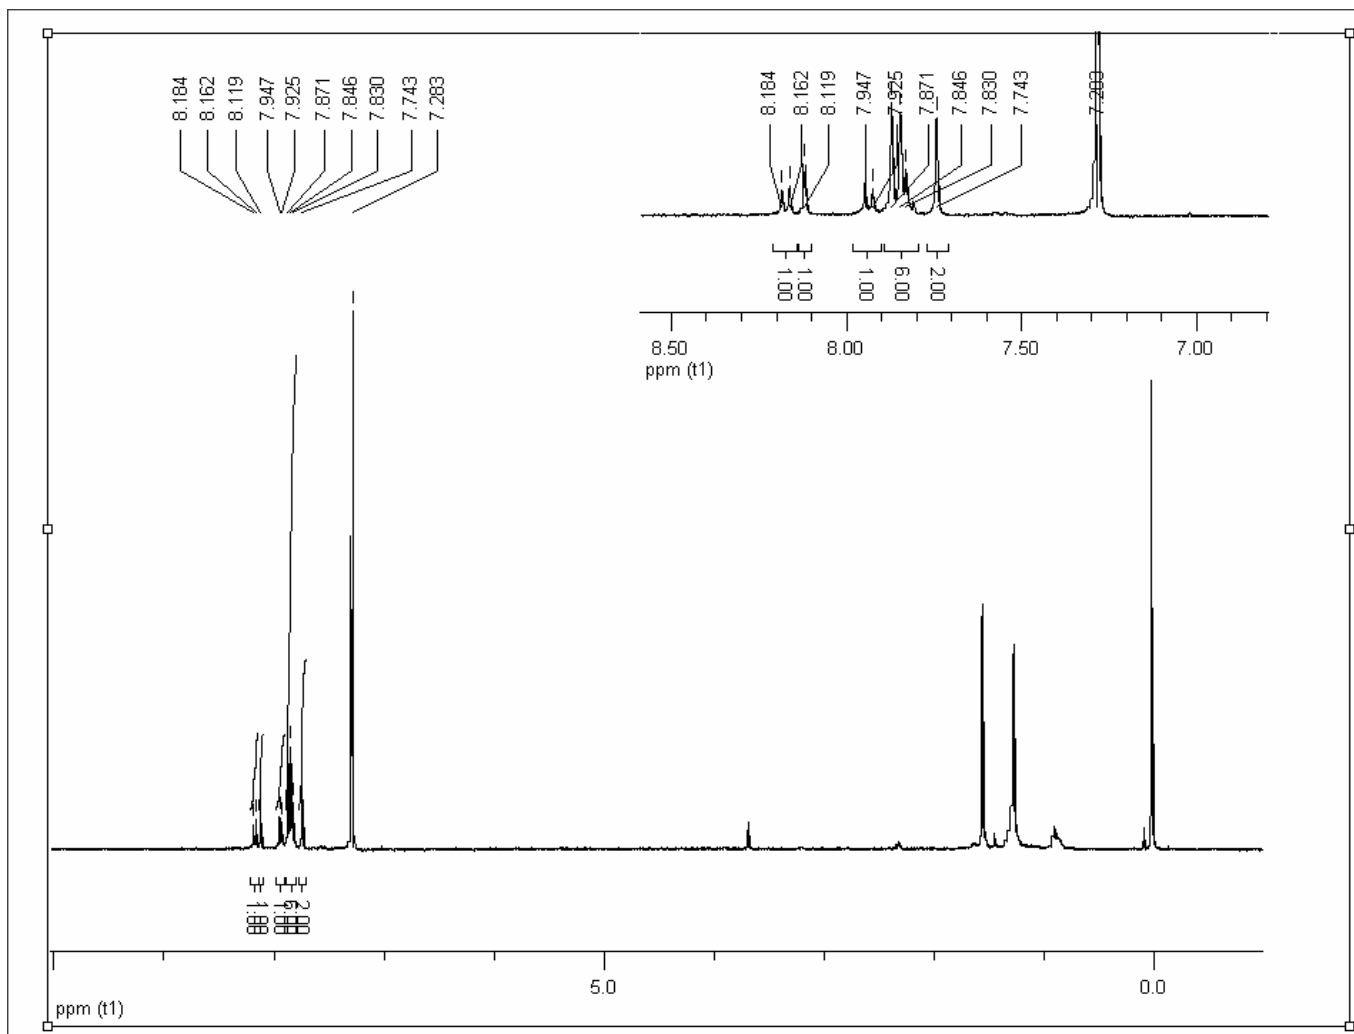

$^1\text{H}$  NMR of 1,4 diethynylcorannulenebenzene (6)

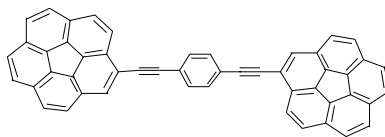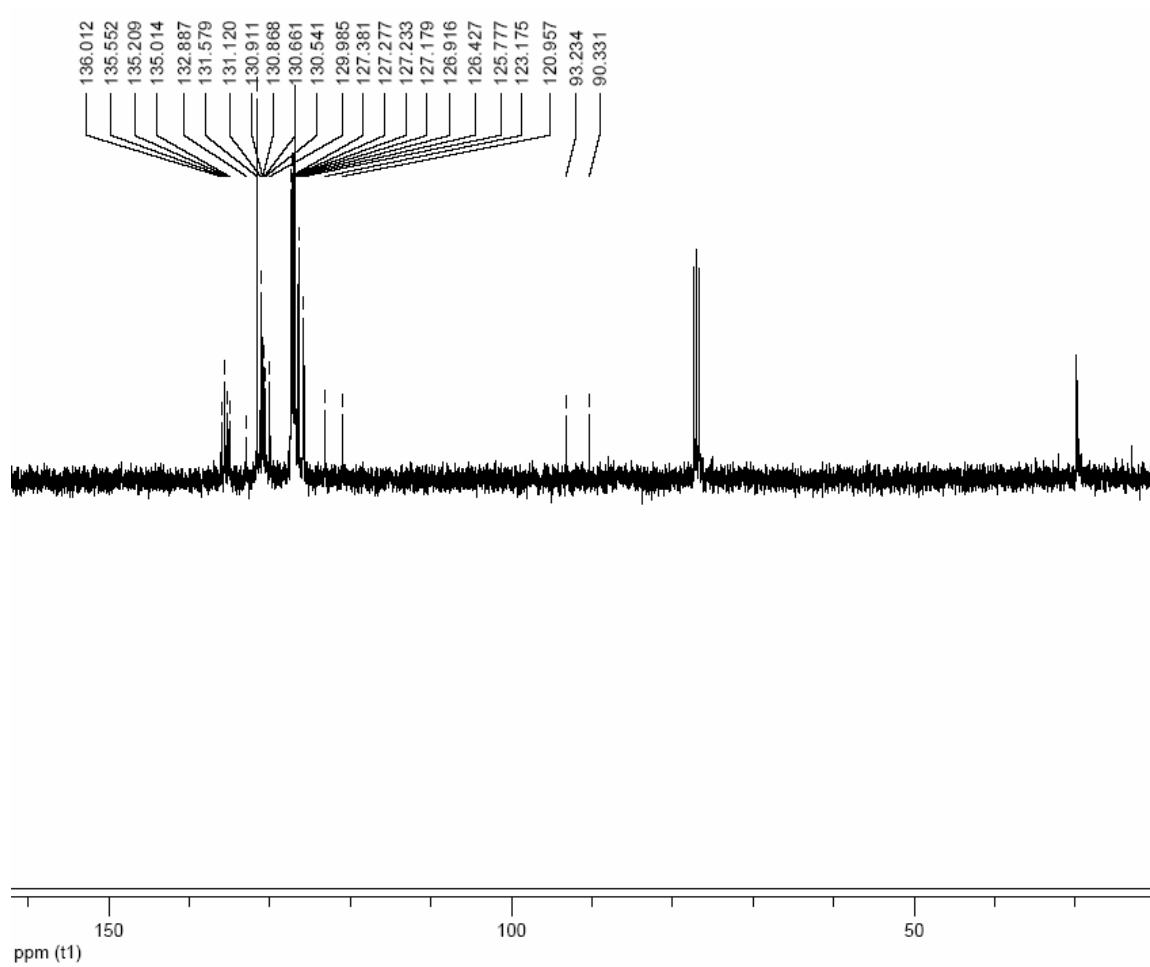

$^{13}\text{C}$  NMR of 1,4-diethynylcorannulenebenzene (**6**)

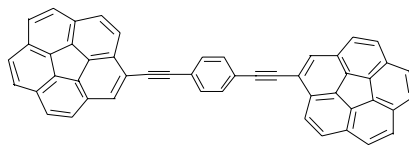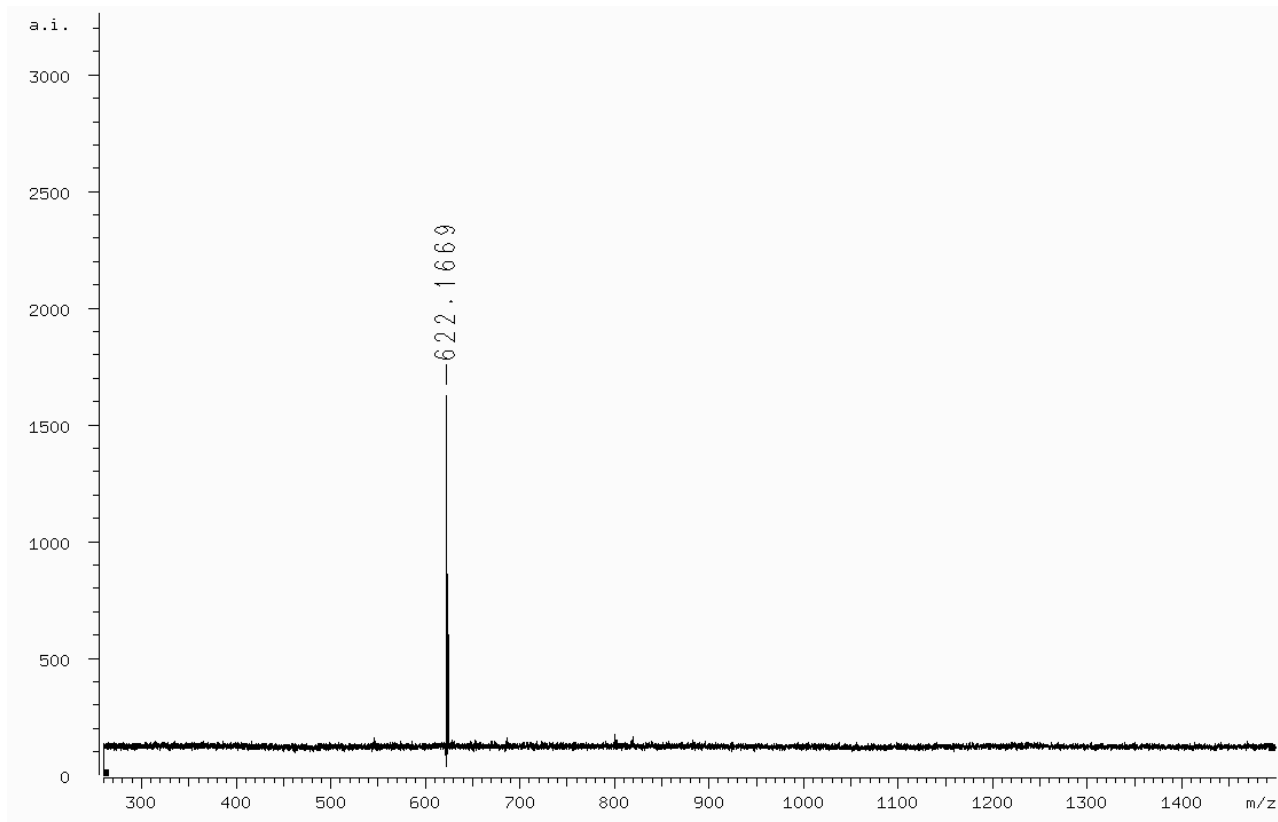

MALDI-TOF of 1,4 diethynylcorannulenebenzene (6)



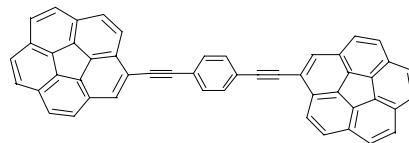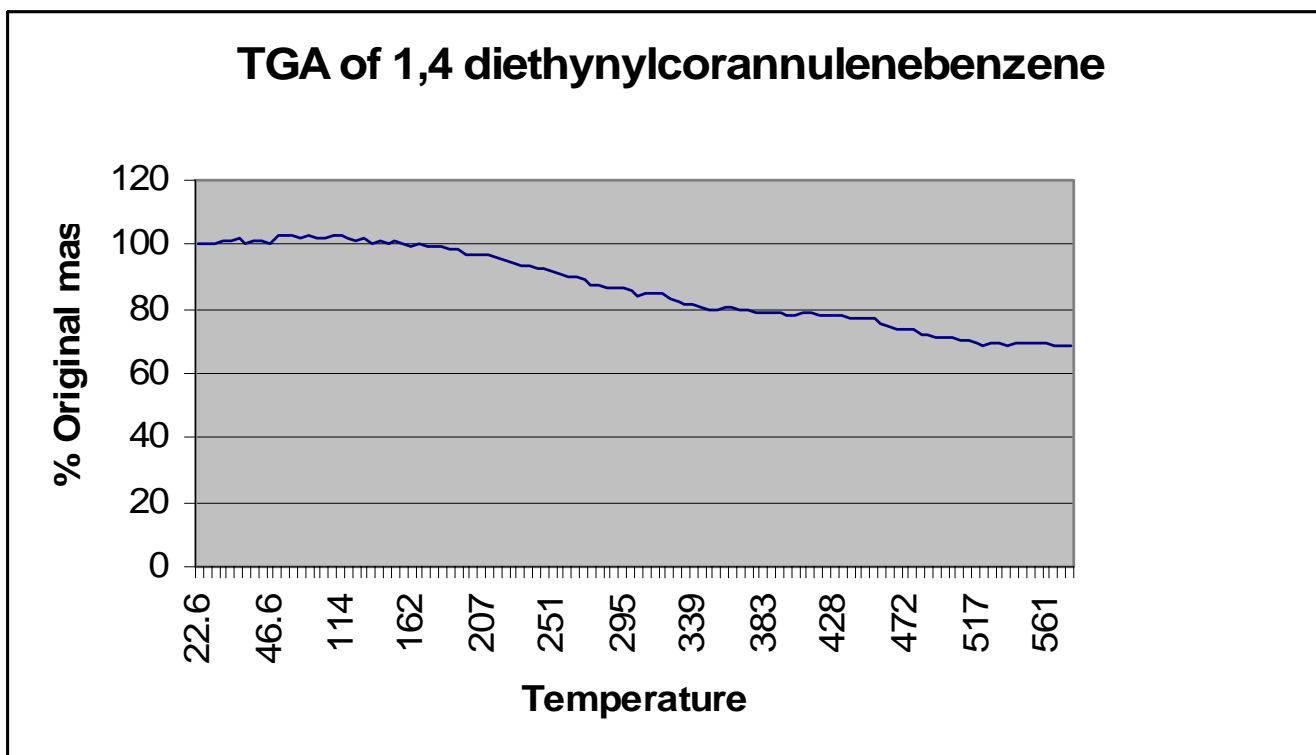

TGA of 1,4-diethynylcorannulenebenzene (6)

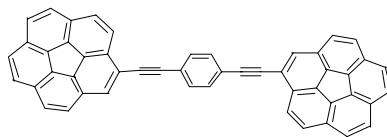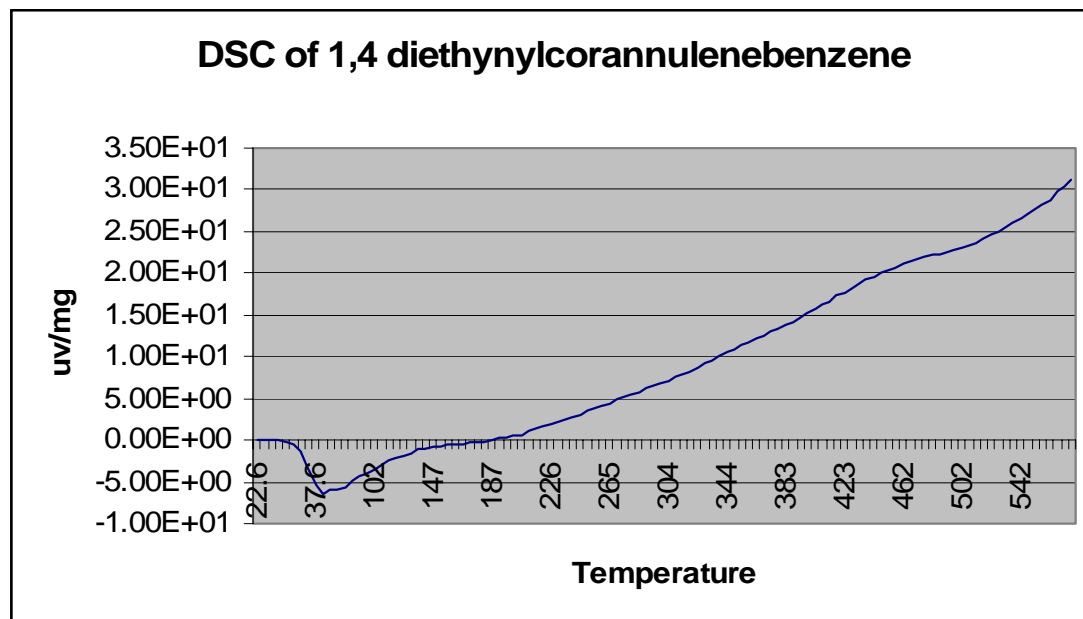

DSC of 1,4-diethynylcorannulenebenzene (6)

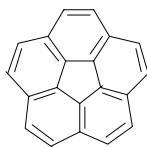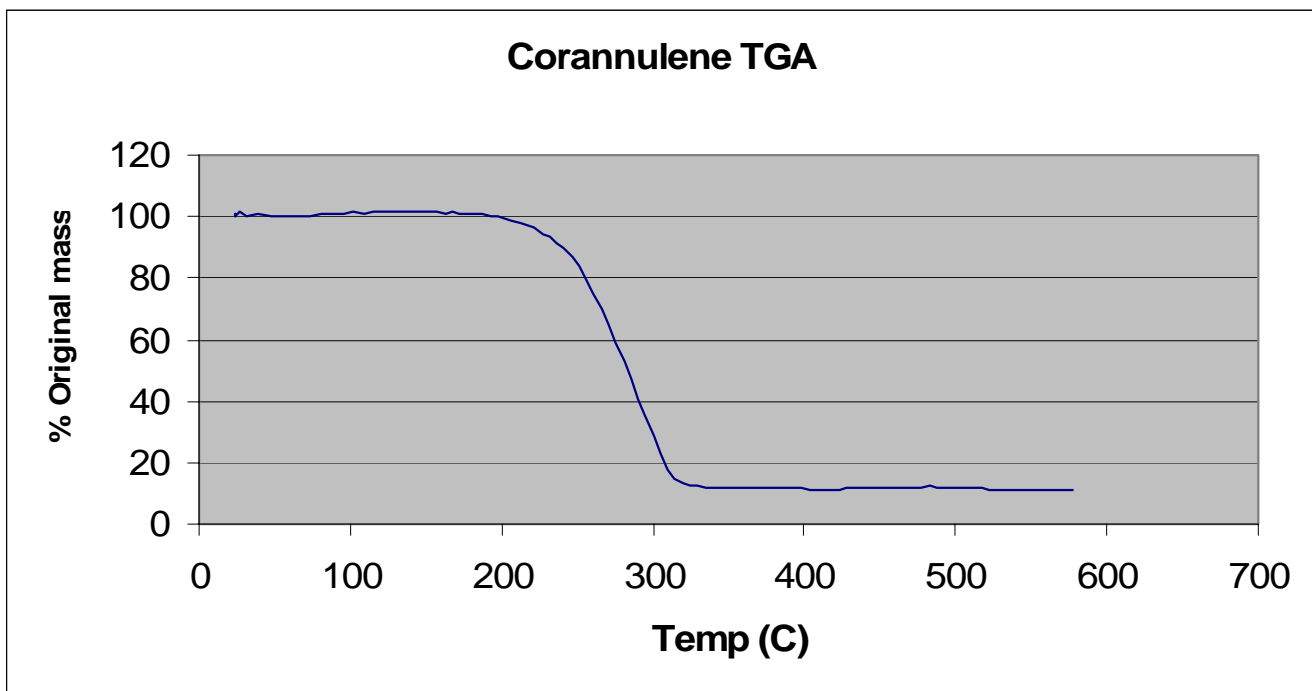

TGA of Corannulene (**1**)

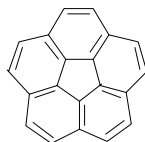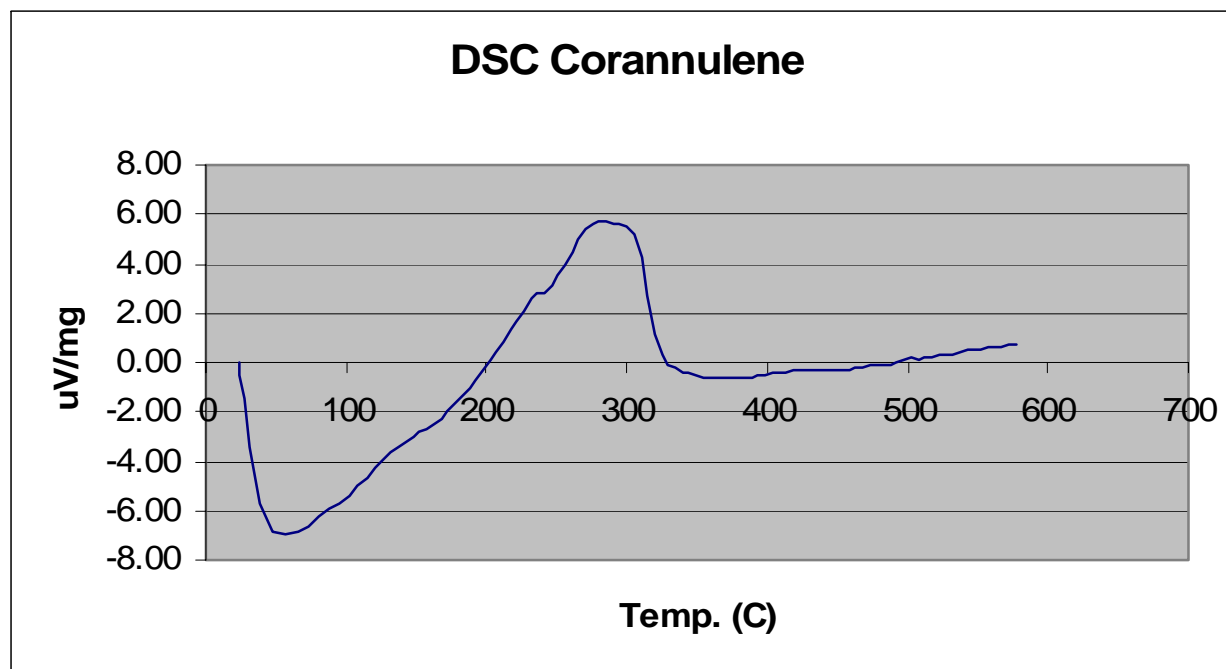

DSC of Corannulene (1)
